# Supplementary material for: Absence of pain in subjects with advanced radiographic knee osteoarthritis
Source: PubMed Central journal article supplement (PMC7526196; doi:10.1186/s12891-020-03647-x), 2020-09-29
Supplement: 12891_2020_3647_MOESM1_ESM.pdf [file 12891_2020_3647_MOESM1_ESM.pdf]

Supplementary table 1. Questionnaires survey in three groups.

| Questionnaires survey | HAS                                                                      | KNHANES                                                                              | OAI                                                                                                           |
|-----------------------|--------------------------------------------------------------------------|--------------------------------------------------------------------------------------|---------------------------------------------------------------------------------------------------------------|
| CVA                   | Q. Have you ever been diagnosed with a stroke?                           | Q. Have you ever been diagnosed with a stroke by a doctor?                           | Q. had stroke, cerebrovascular accident, blood clot or bleeding in brain, or transient ischemic attack (TIA)? |
| Myocardial infarction | Q. Have you ever been diagnosed with an angina or myocardial infarction? | Q. Have you ever been diagnosed with an angina or myocardial infarction by a doctor? | Q. ever had heart attack                                                                                      |
| Diabetes mellitus     | Q. Have you ever been diagnosed with diabetes mellitus?                  | Q. Have you ever been diagnosed with diabetes mellitus by a doctor?                  | Q. had diabetes (high blood sugar)                                                                            |
| Hyperlipidemia        | Q. Have you ever been diagnosed with hyperlipidemia?                     | Q. Have you ever been diagnosed with hyperlipidemia by a doctor?                     | NA                                                                                                            |

|              |                                                    |                                                                |                                                                                                                                                                                                                                                                   |
|--------------|----------------------------------------------------|----------------------------------------------------------------|-------------------------------------------------------------------------------------------------------------------------------------------------------------------------------------------------------------------------------------------------------------------|
| Osteoporosis | Q. Have you ever been diagnosed with osteoporosis? | Q. Have you ever been diagnosed with osteoporosis by a doctor? | Q1. taken bisphosphonate medication(includes alendronate, risedronate) to treat osteoporosis or paget disease past 5 years<br><br>Q2. Used parathyroid hormone or PTH (includes Forteo, or teriparatide, given by injection) to treat osteoporosis past 6 months. |
|--------------|----------------------------------------------------|----------------------------------------------------------------|-------------------------------------------------------------------------------------------------------------------------------------------------------------------------------------------------------------------------------------------------------------------|

HAS: Hallym Aging Study, KNHANES: the Korean National Health and Nutrition Examination Survey, OAI: Osteoarthritis Initiative, CVA: cerebrovascular accident
